# Supplementary material for: Poly(curcumin β-amino ester)-Based Tablet Formulation for a Sustained Release of Curcumin
Source: MDPI journal article supplement (doi:10.3390/gels8060337), 2022-05-30
Supplement: s1 [file s1]

**Supplementary Material:**

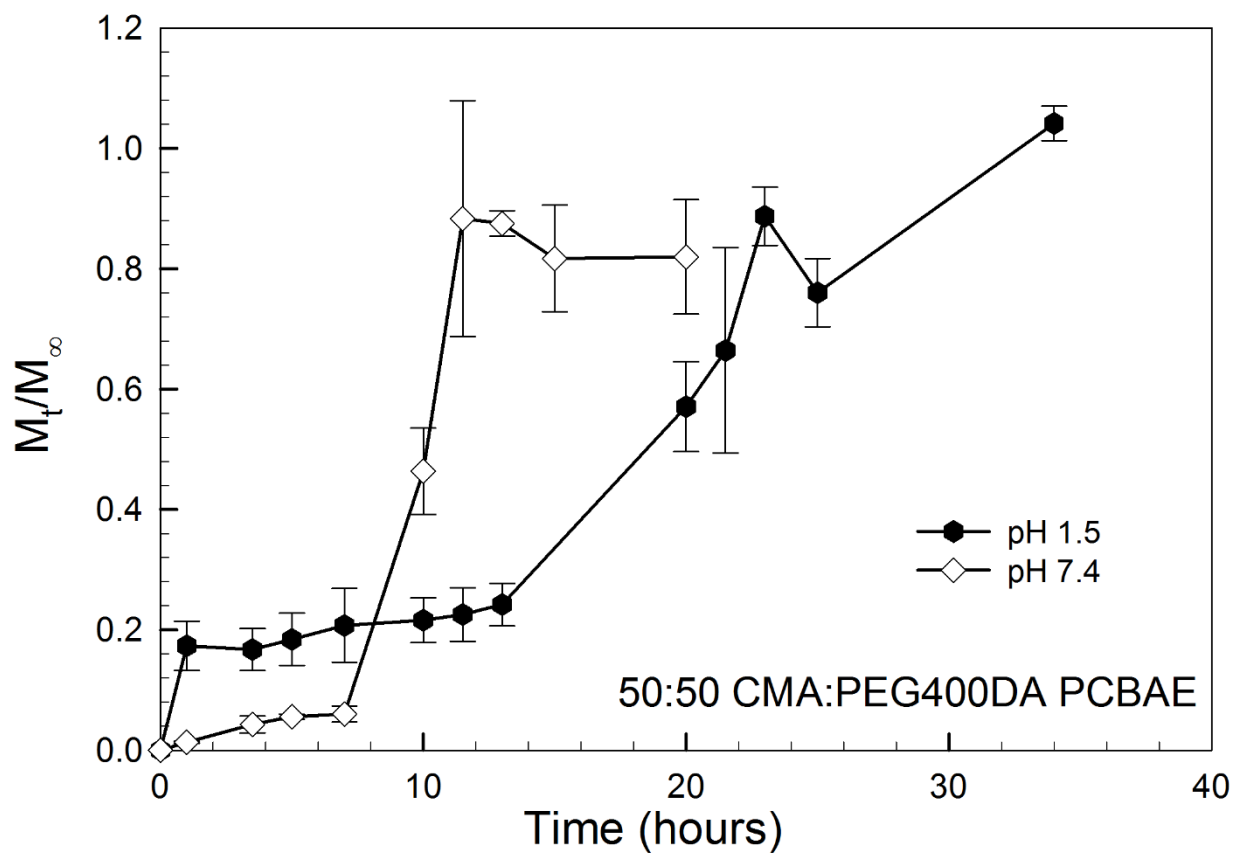

**Figure S1.** Curcumin release profiles for 50:50 CMA:PEG400DA Poly(curcumin  $\beta$ -amino ester) (PCBAE) hydrogel film degradation in simulated gastric fluid (SGF) (pH 1.5) and PBS (pH 7.4). A slower release is observed at lower pH. PCBAE sample degraded completely in ~ 10 hours at pH 7.4 while it degraded in ~21 hours at pH 1.5. The degradation of PCBAE is slower at lower pH since the carboxylic acids are formed by the hydrolysis of PCBAE. .
